# Supplementary material
Source: publisher figshare collection journal article supplement (https://tandf.figshare.com/ndownloader/files/30927100)
Supplement: Supplementary file 2 [file 30927100]

# Online Supplementary Materials

## Appendix A: Earthquake intensity levels

Using the estimated PGA, we created three measures of exposure to the earthquake: one with three levels, another with five levels, and a final one with ten levels.

We defined the exposure with three intensity levels as follows.

- Low PGA ( $\text{PGA} < 0.08$ ): felt by many people indoors; no buildings received damage.
- Medium PGA ( $0.08 \leq \text{PGA} \leq 0.25$ ): felt by most or all people indoors; some people were frightened; damages in some (non-resistant) buildings.
- High PGA ( $\text{PGA} > 0.25$ ): many people were frightened; severe shaking; damages in resistant buildings.

For the versions of the exposure with five and ten levels, we divided the students into PGA quintiles and deciles, respectively.

## Appendix B: Covariate profiles

Table 6: Covariate profile of the population and template sample

| Covariate                        | Population | Template |
|----------------------------------|------------|----------|
| Female                           | 0.54       | 0.51     |
| Indigenous                       |            |          |
| Indigenous                       | 0.08       | 0.07     |
| Missing                          | 0.15       | 0.14     |
| Father's education               |            |          |
| Secondary                        | 0.39       | 0.40     |
| Technical                        | 0.09       | 0.09     |
| College                          | 0.15       | 0.14     |
| Missing                          | 0.05       | 0.04     |
| Mother's education               |            |          |
| Secondary                        | 0.41       | 0.43     |
| Technical                        | 0.13       | 0.12     |
| College                          | 0.12       | 0.12     |
| Missing                          | 0.01       | 0.01     |
| Household income (2008 CL\$1000) |            |          |
| 100-200                          | 0.26       | 0.26     |
| 200-400                          | 0.30       | 0.31     |
| 400-600                          | 0.13       | 0.12     |
| 600-1400                         | 0.13       | 0.14     |
| 1400 or more                     | 0.09       | 0.09     |
| Missing                          | 0.01       | 0.02     |
| Number of books at home          |            |          |
| 1-10                             | 0.19       | 0.19     |
| 11-50                            | 0.46       | 0.46     |
| 51-10                            | 0.16       | 0.16     |
| More than 100                    | 0.16       | 0.16     |
| Missing                          | 0.01       | 0.01     |

Table 6 (continued): Covariate profile of the population and template sample

| Covariate                       | Population | Template |
|---------------------------------|------------|----------|
| Student's attendance (deciles)  |            |          |
| 2                               | 0.12       | 0.11     |
| 3                               | 0.08       | 0.09     |
| 4                               | 0.10       | 0.10     |
| 5                               | 0.13       | 0.13     |
| 6                               | 0.08       | 0.08     |
| 7                               | 0.09       | 0.09     |
| 8                               | 0.10       | 0.09     |
| 9                               | 0.11       | 0.10     |
| 10                              | 0.15       | 0.16     |
| Student's GPA 2008 (deciles)    |            |          |
| 2                               | 0.11       | 0.11     |
| 3                               | 0.11       | 0.09     |
| 4                               | 0.10       | 0.11     |
| 5                               | 0.10       | 0.10     |
| 6                               | 0.10       | 0.11     |
| 7                               | 0.09       | 0.09     |
| 8                               | 0.10       | 0.10     |
| 9                               | 0.09       | 0.10     |
| 10                              | 0.08       | 0.08     |
| Student's test scores (deciles) |            |          |
| 2                               | 0.08       | 0.07     |
| 3                               | 0.09       | 0.10     |
| 4                               | 0.09       | 0.10     |
| 5                               | 0.10       | 0.10     |
| 6                               | 0.10       | 0.11     |
| 7                               | 0.11       | 0.10     |
| 8                               | 0.12       | 0.12     |
| 9                               | 0.12       | 0.11     |
| 10                              | 0.12       | 0.13     |
| Missing                         | 0.01       | 0.01     |
| School administration           |            |          |
| Public                          | 0.34       | 0.34     |
| Private subsidized (voucher)    | 0.55       | 0.55     |
| Rural school                    | 0.03       | 0.02     |
| Catholic school                 | 0.24       | 0.23     |
| School SES                      |            |          |
| Mid-low                         | 0.32       | 0.32     |
| Medium                          | 0.29       | 0.30     |
| Mid-high                        | 0.18       | 0.17     |
| High                            | 0.11       | 0.12     |
| School's test scores (deciles)  |            |          |
| 2                               | 0.07       | 0.07     |
| 3                               | 0.09       | 0.07     |
| 4                               | 0.09       | 0.09     |
| 5                               | 0.10       | 0.11     |
| 6                               | 0.11       | 0.12     |
| 7                               | 0.10       | 0.11     |
| 8                               | 0.12       | 0.12     |
| 9                               | 0.12       | 0.11     |
| 10                              | 0.13       | 0.13     |

## Appendix C: Proofs

To prove Proposition 4.2 we use the following lemma.

**Lemma 6.1.** *Let  $(\mathbf{z}, \mathbf{v})$  be a feasible solution for the LP relaxation of (4) that satisfies all inequalities (4b) at equality. Furthermore, let  $\underline{\mathbf{z}}$  and  $\overline{\mathbf{z}}$  be such that*

- $\mathbf{z} = \frac{1}{2}\underline{\mathbf{z}} + \frac{1}{2}\overline{\mathbf{z}}$  and,
- $\max \left\{ \left| \sum_{\ell \in \mathcal{L}_{p,k}} \underline{z}_\ell - \sum_{\ell \in \mathcal{L}_{p,k}} z_\ell \right|, \left| \sum_{\ell \in \mathcal{L}_{p,k}} \overline{z}_\ell - \sum_{\ell \in \mathcal{L}_{p,k}} z_\ell \right| \right\} \leq v_{p,k}$  for all  $p \in \mathcal{P}$  and  $k \in \mathcal{K}(p)$ .

If  $\underline{\mathbf{v}}$  and  $\overline{\mathbf{v}}$  are such that for all  $p \in \mathcal{P}$  and  $k \in \mathcal{K}(p)$ ,

- $\underline{v}_{p,k} = v_{p,k} + \text{sign} \left( \sum_{\ell \in \mathcal{L}_{p,k}} z_\ell - N_{p,k} \right) \left( \sum_{\ell \in \mathcal{L}_{p,k}} \underline{z}_\ell - \sum_{\ell \in \mathcal{L}_{p,k}} z_\ell \right)$ , and
- $\overline{v}_{p,k} = v_{p,k} + \text{sign} \left( \sum_{\ell \in \mathcal{L}_{p,k}} z_\ell - N_{p,k} \right) \left( \sum_{\ell \in \mathcal{L}_{p,k}} \overline{z}_\ell - \sum_{\ell \in \mathcal{L}_{p,k}} z_\ell \right)$ ,

where  $\text{sign}(w) = w/|w|$ , then we have that

$$(\underline{\mathbf{z}}, \underline{\mathbf{v}}) \text{ and } (\overline{\mathbf{z}}, \overline{\mathbf{v}}) \text{ are feasible for the LP relaxation of (4), and} \quad (5a)$$

$$(\mathbf{z}, \mathbf{v}) = \frac{1}{2}(\underline{\mathbf{z}}, \underline{\mathbf{v}}) + \frac{1}{2}(\overline{\mathbf{z}}, \overline{\mathbf{v}}). \quad (5b)$$

*Proof.* Condition (5a) follows by noting that under the equality assumption on (4b), for all  $p \in \mathcal{P}$  and  $k \in \mathcal{K}(p)$  we have that if  $\varepsilon < v_{p,k}$ , then

$$\left| \left( \sum_{\ell \in \mathcal{L}_{p,k}} z_\ell \right) + \varepsilon - N_{p,k} \right| = v_{p,k} + \text{sign} \left( \sum_{\ell \in \mathcal{L}_{p,k}} z_\ell - N_{p,k} \right) \varepsilon \quad (6)$$

$$\left| \left( \sum_{\ell \in \mathcal{L}_{p,k}} z_\ell \right) - \varepsilon - N_{p,k} \right| = v_{p,k} - \text{sign} \left( \sum_{\ell \in \mathcal{L}_{p,k}} z_\ell - N_{p,k} \right) \varepsilon. \quad (7)$$

Condition (5b) follows by noting that  $\mathbf{z} = \frac{1}{2}\underline{\mathbf{z}} + \frac{1}{2}\overline{\mathbf{z}}$  implies  $\left( \sum_{\ell \in \mathcal{L}_{p,k}} \underline{z}_\ell - \sum_{\ell \in \mathcal{L}_{p,k}} z_\ell \right) = - \left( \sum_{\ell \in \mathcal{L}_{p,k}} \overline{z}_\ell - \sum_{\ell \in \mathcal{L}_{p,k}} z_\ell \right)$  for all  $p \in \mathcal{P}$  and  $k \in \mathcal{K}(p)$ . □

*Proof of Proposition 4.2.* In both cases we show that for any non-integral point  $(\mathbf{z}, \mathbf{v})$  that is feasible for the LP relaxation of (4), there exist  $(\underline{\mathbf{z}}, \underline{\mathbf{v}})$  and  $(\overline{\mathbf{z}}, \overline{\mathbf{v}})$  that satisfy (5) and  $(\underline{\mathbf{z}}, \underline{\mathbf{v}}) \neq (\overline{\mathbf{z}}, \overline{\mathbf{v}})$ , which implies that non-integral points cannot be extreme points.

First note that if there exist  $p \in \mathcal{P}$  and  $k \in \mathcal{K}(p)$  for which  $\varepsilon := v_{p,k} - \left| \sum_{\ell \in \mathcal{L}_{p,k}} z_\ell - N_{p,k} \right| > 0$ , then by letting  $(\underline{\mathbf{z}}, \underline{\mathbf{v}}) = (\overline{\mathbf{z}}, \overline{\mathbf{v}}) = (\mathbf{z}, \mathbf{v})$  and changing  $\underline{v}_{p,k}$  to  $v_{p,k} - \varepsilon$  and  $\overline{v}_{p,k}$  to  $v_{p,k} + \varepsilon$  we satisfy (5) and  $(\underline{\mathbf{z}}, \underline{\mathbf{v}}) \neq (\overline{\mathbf{z}}, \overline{\mathbf{v}})$ . Hence, without loss of generality we may assume that  $(\mathbf{z}, \mathbf{v})$  satisfies all constraints (4b) at equality.

Under the equality assumption on (4b), for all  $p \in \mathcal{P}$  and  $k \in \mathcal{K}(p)$  we have that

$$v_{p,k} \notin \mathbb{Z}_+ \text{ or } |\{\ell \in \mathcal{L}_{p,k} : z_\ell \in (0, 1)\}| \neq 1. \quad (8)$$

For case 1 it suffices to prove the result for  $P = 2$  (The result follows for  $P = 1$  by copying the covariate as the result for  $P = 2$  does not require that the covariates are different). For  $P = 2$ , we may use (8) (and the assumption that at least one  $z_l$  is fractional) to construct sequences  $\{s_1, \dots, s_S\} \subseteq \{1, \dots, L\}$  and  $\{r_1, \dots, r_{S+1}\} \subseteq \{1, \dots, \max\{K_{p_1}, K_{p_2}\}\}$  such that (without loss of generality by possibly interchanging  $p_1$  and  $p_2$ ):

- $s_i \neq s_j$  for all  $i, j \in \{1, \dots, S\}$  with  $i \neq j$ ,
- $r_i \neq r_j$  for all  $i, j \in \{1, \dots, S+1\}$  with  $i < j$ ,  $(i-j)/2 \in \mathbb{Z}$  and  $(i, j) \neq (1, S+1)$ ,
- $z_{\ell_{s_j}} \in (0, 1)$  for all  $j \in \{1, \dots, S\}$ ,
- $k_{r_j} \in \mathcal{K}(p_{h(j)})$  for all  $j \in \{1, \dots, S+1\}$  where

$$h(j) = 2 - j + 2 \lfloor j/2 \rfloor = \begin{cases} 1 & j \text{ is odd} \\ 2 & j \text{ is even,} \end{cases}$$

- $\ell_{s_j} \in \mathcal{L}_{p_{h(j)}, k_{r_j}}$  and  $\ell_{s_j} \in \mathcal{L}_{p_{h(j+1)}, k_{r_{j+1}}}$  for all  $j \in \{1, \dots, S\}$ ,

and either

$$S \text{ is even, } h(1) = h(S+1) \text{ and } r_1 = r_{S+1} \quad (9)$$

or

$$v_{p_{h(1)}, k_{r_1}}, v_{p_{h(S+1)}, k_{r_{S+1}}} \notin \mathbb{Z}, \quad (10a)$$

$$\left\{ \ell \in \mathcal{L}_{p_{h(1)}, k_{r_1}} : z_\ell \in (0, 1) \right\} = \{\ell_{s_1}\}, \quad (10b)$$

$$\left\{ \ell \in \mathcal{L}_{p_{h(S+1)}, k_{r_{S+1}}} : z_\ell \in (0, 1) \right\} = \{\ell_{s_S}\}. \quad (10c)$$

If (9) holds, let  $\varepsilon = \min_{i=1}^S \left\{ z_{\ell_{s_j}}, 1 - z_{\ell_{s_j}} \right\} > 0$ ,  $\underline{z}$  and  $\bar{z}$  be such that

$$\underline{z}_{\ell_i} = \begin{cases} z_{\ell_i} - \varepsilon & \text{if } i = s_j \text{ for an odd } j \in S, \\ z_{\ell_i} + \varepsilon & \text{if } i = s_j \text{ for an even } j \in S, \\ z_{\ell_i} & \text{otherwise} \end{cases} \quad (11a)$$

$$\bar{z}_{\ell_i} = \begin{cases} z_{\ell_i} + \varepsilon & \text{if } i = s_j \text{ for an odd } j \in S, \\ z_{\ell_i} - \varepsilon & \text{if } i = s_j \text{ for an even } j \in S, \\ z_{\ell_i} & \text{otherwise.} \end{cases} \quad (11b)$$

The result follows from Lemma 6.1 (with  $\underline{\mathbf{v}} = \overline{\mathbf{v}} = \mathbf{v}$ ) because  $\sum_{\ell \in \mathcal{L}_{p,k}} \underline{z}_\ell = \sum_{\ell \in \mathcal{L}_{p,k}} \overline{z}_\ell = \sum_{\ell \in \mathcal{L}_{p,k}} z_\ell$  for all  $p \in \mathcal{P}$  and  $k \in \mathcal{K}(p)$ .

If instead (10) holds let

$$\varepsilon = \min \left\{ \min_{i=1}^S \left\{ z_{\ell_{s_j}}, 1 - z_{\ell_{s_j}} \right\}, v_{p_{h(1)}, k_{r1}}, v_{p_{h(S+1)}, k_{r_{S+1}}} \right\}$$

$\underline{\mathbf{z}}$  and  $\overline{\mathbf{z}}$  be as defined in (11) with this new  $\varepsilon$ , and the result again follows from Lemma 6.1 by noting that (10a) implies  $\varepsilon$  remains strictly positive.

For case 2 we only need to prove the result for  $P \geq 3$ . By (8) (and the assumption that at least one  $z_l$  is fractional), there exist  $k \in \mathcal{K}(p_P)$  such that either  $|\{\ell \in \mathcal{L}_{p_P,k} : z_\ell \in (0,1)\}| \geq 2$  or,  $|\{\ell \in \mathcal{L}_{p_P,k} : z_\ell \in (0,1)\}| = 1$  and  $v_{p_P,k} > 0$ .

In the first case let  $s_1 \neq s_2$  be such that  $\ell_{s_1}, \ell_{s_2} \in \{\ell \in \mathcal{L}_{p_P,k} : z_\ell \in (0,1)\}$ ,  $\varepsilon = \min_{i=1}^2 \left\{ z_{\ell_{s_j}}, 1 - z_{\ell_{s_j}} \right\} > 0$ , and  $\underline{\mathbf{z}}$  and  $\overline{\mathbf{z}}$  be such that

$$\underline{z}_{\ell_i} = \begin{cases} z_{\ell_i} - \varepsilon & \text{if } i = s_1, \\ z_{\ell_i} + \varepsilon & \text{if } i = s_2, \\ z_{\ell_i} & \text{otherwise} \end{cases}$$

$$\overline{z}_{\ell_i} = \begin{cases} z_{\ell_i} + \varepsilon & \text{if } i = s_1, \\ z_{\ell_i} - \varepsilon & \text{if } i = s_2, \\ z_{\ell_i} & \text{otherwise.} \end{cases}$$

Then  $\sum_{\ell \in \mathcal{L}_{p_P,k}} \underline{z}_\ell = \sum_{\ell \in \mathcal{L}_{p_P,k}} \overline{z}_\ell = \sum_{\ell \in \mathcal{L}_{p_P,k}} z_\ell$  for all  $k \in \mathcal{K}(p_P)$ . Furthermore, by assumption, for all  $k \in \mathcal{K}(p_P)$  and  $i \in \{1, \dots, P-1\}$  there exist  $k' \in \mathcal{K}(p_i)$  such that  $\mathcal{L}_{p_P,k} \subseteq \mathcal{L}_{p_i,k'}$ , so we also have  $\sum_{\ell \in \mathcal{L}_{p,k}} \underline{z}_\ell = \sum_{\ell \in \mathcal{L}_{p,k}} \overline{z}_\ell = \sum_{\ell \in \mathcal{L}_{p,k}} z_\ell$  for all  $p \in \mathcal{P}$  and  $k \in \mathcal{K}(p)$ . The result then follows from Lemma 6.1 (with  $\underline{\mathbf{v}} = \overline{\mathbf{v}} = \mathbf{v}$ ).

In the second case, let  $s \in \{1, \dots, L\}$  be such that  $\{\ell_s\} = \{\ell \in \mathcal{L}_{p_P,k} : z_\ell \in (0,1)\}$ ,

$$\varepsilon = \min \left\{ z_{\ell_s}, 1 - z_{\ell_s}, \min \left\{ \min \{v_{p,k'}, 1 - v_{p,k'}\} : p \in \mathcal{P}, \quad k' \in \mathcal{K}(p) \text{ such that } \ell_s \in \mathcal{L}_{p,k'} \right\} \right\},$$

and  $\underline{z}$  and  $\bar{z}$  be such that

$$\underline{z}_{\ell_i} = \begin{cases} z_{\ell_i} - \varepsilon & \text{if } i = s, \\ z_{\ell_i} & \text{otherwise} \end{cases}$$

$$\bar{z}_{\ell_i} = \begin{cases} z_{\ell_i} + \varepsilon & \text{if } i = s, \\ z_{\ell_i} & \text{otherwise.} \end{cases}$$

By assumption, for all  $i \in \{1, \dots, P-1\}$  there exist  $k' \in \mathcal{K}(p_i)$  such that  $\mathcal{L}_{pP,k} \subseteq \mathcal{L}_{p_i,k'}$  and  $\mathcal{T}_{pP,k} \subseteq \mathcal{T}_{p_i,k'}$  so,  $v_{pP,k} > 0$  implies that  $v_{p,k'} > 0$  for all  $p \in \mathcal{P}$  and  $k' \in \mathcal{K}(p)$  such that  $\ell_s \in \mathcal{L}_{p,k'}$ . Then  $\varepsilon > 0$  and the result follows from Lemma 6.1.  $\square$

*Proof of Lemma 4.3.* Let

$$\begin{aligned} \mathbf{x}_1 &= (k_1, k_1, k_1), & \mathbf{x}_2 &= (k_3, k_3, k_3), \\ \mathbf{x}_1 &= (k_1, k_2, k_3), & \mathbf{x}_2 &= (k_3, k_2, k_1), \\ \mathbf{x}_1 &= (k_2, k_1, k_2), & \mathbf{x}_2 &= (k_2, k_3, k_2), \end{aligned}$$

$T = 3$ ,  $L = 6$  and  $N_{p,k} = 1$  for all  $p$  and  $k$ . The feasible region of the LP relaxation of (4) for this case is given by

$$\begin{aligned} |z_{\ell_1} + z_{\ell_3} - 1| &\leq v_{p_1,k_1}, & |z_{\ell_5} + z_{\ell_6} - 1| &\leq v_{p_1,k_2}, & |z_{\ell_2} + z_{\ell_4} - 1| &\leq v_{p_1,k_3}, \\ |z_{\ell_1} + z_{\ell_5} - 1| &\leq v_{p_2,k_1}, & |z_{\ell_3} + z_{\ell_4} - 1| &\leq v_{p_2,k_2}, & |z_{\ell_2} + z_{\ell_6} - 1| &\leq v_{p_2,k_3}, \\ |z_{\ell_1} + z_{\ell_4} - 1| &\leq v_{p_3,k_1}, & |z_{\ell_5} + z_{\ell_6} - 1| &\leq v_{p_3,k_2}, & |z_{\ell_2} + z_{\ell_3} - 1| &\leq v_{p_3,k_3} \end{aligned}$$

$$\sum_{i=1}^6 z_{\ell_i} = 1, \quad 0 \leq z_{\ell_i} \leq 1 \quad \forall i \in \{1, \dots, 6\}.$$

Using CDDLib (Fukuda 2001) we can check that this LP has 11 fractional extreme points out of a total of 31. In particular,  $z_{\ell_i} = 1/2$  for all  $i \in \{1, \dots, 6\}$  and  $v_{p,k} = 0$  for all  $p$  and  $k$  is one such fractional extreme point. Finally, Proposition 4.1 implies that (1) for this data also fails to be integral.  $\square$

## Appendix D: Covariate balance

Figure 3: Standardized differences in means in covariates before and after matching for 10 levels of exposure.

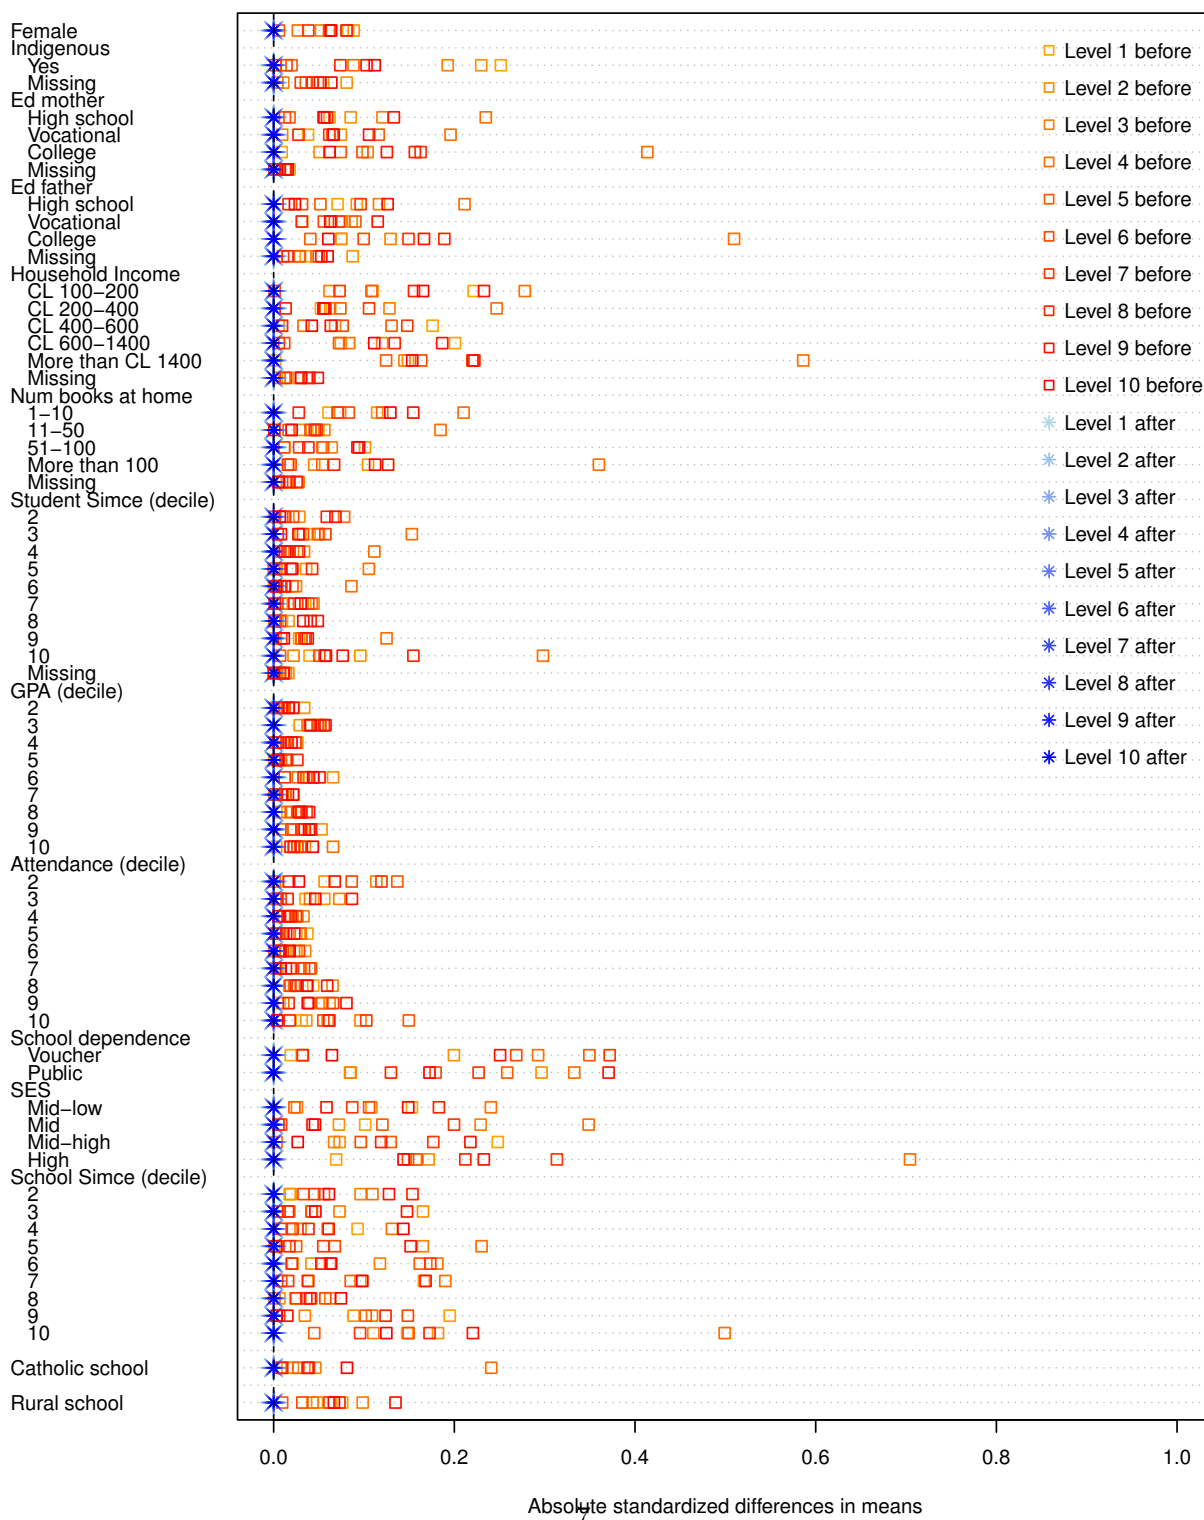

## Appendix E: Effect estimates

Table 7: Effect estimates and 95% confidence intervals for different levels of exposure to the earthquake. The point estimates are contrasts with respect to exposure level 1. The 95% confidence account for multiple comparisons.

(a) 3 exposure levels

| Exposure level | Attendance (%)            | PSU score             |
|----------------|---------------------------|-----------------------|
| 2              | -1.00<br>[-2.01,0.00]     | 11.00<br>[1.90,18.50] |
| 3              | -11.85<br>[-12.35,-11.00] | 8.00<br>[1.50,14.10]  |

(b) 5 exposure levels

| Exposure level | Attendance (%)            | PSU score             |
|----------------|---------------------------|-----------------------|
| 2              | -0.00<br>[-1.00,1.00]     | 6.00<br>[-0.60,14.00] |
| 3              | -2.55<br>[-4.00,-1.99]    | 6.50<br>[-0.10,13.50] |
| 4              | -4.00<br>[-5.01,-3.00]    | 4.50<br>[-3.00,11.00] |
| 5              | -12.95<br>[-13.70,-12.09] | 8.50<br>[0.90,15.10]  |

(c) 10 exposure levels

| Exposure level | Attendance (%)            | PSU score              |
|----------------|---------------------------|------------------------|
| 2              | 0.00<br>[-0.01,1.01]      | 4.00<br>[-3.50,11.60]  |
| 3              | 0.00<br>[-1.00,1.01]      | 9.00<br>[0.90,17.10]   |
| 4              | -1.00<br>[-2.00,0.01]     | 10.00<br>[2.00,17.60]  |
| 5              | -2.00<br>[-2.16,-0.99]    | 9.00<br>[0.90,16.50]   |
| 6              | -3.00<br>[-4.01,-2.00]    | 7.50<br>[-0.50,14.50]  |
| 7              | -2.00<br>[-3.01,-1.69]    | -3.50<br>[-3.60,11.00] |
| 8              | -6.10<br>[-7.66,-5.00]    | -4.00<br>[-4.10,11.10] |
| 9              | -11.80<br>[-12.85,-10.80] | 9.00<br>[1.50,17.50]   |
| 10             | -13.75<br>[-14.56,-12.94] | 10.50<br>[3.0,18.60]   |
